# Supplementary material
Source: publisher figshare collection journal article supplement (https://acs.figshare.com/ndownloader/files/4390294)
Supplement: Supplementary file 1 [file 4390294]

 data_publication_text
 _publ_requested_journal           'J. Am. Chem. Soc.'
_publ_contact_author_name        'Hiroshi Danjo'
_publ_contact_author_address     
;Department of Chemistry
Faculty of Science and Technology
Konan University
Okamoto Higashinada Kobe 6588501 Japan
;
_publ_contact_author_email       danjo@konan-u.ac.jp
_publ_contact_author_phone       81(78)4352502
_publ_contact_author_fax         81(78)4352539
loop_
_publ_author_name
_publ_author_address
'Danjo, Hiroshi'
;Department of Chemistry
Faculty of Science and Technology
Konan University
Okamoto Higashinada Kobe 658-8501 Japan
;
'Hirata, Kadzuya'
;Department of Chemistry
Faculty of Science and Technology
Konan University
Okamoto Higashinada Kobe 6588501 Japan
;
'Noda, Masanori'
;Department of Biotechnology
Graduate School of Engineering
Osaka University
Yamadaoka Suita Osaka 5650871 Japan
;
'Uchiyama, Susumu'
;Department of Biotechnology
Graduate School of Engineering
Osaka University
Yamadaoka Suita Osaka 5650871 Japan
;
'Fukui, Kiichi'
;Department of Biotechnology
Graduate School of Engineering
Osaka University
Yamadaoka Suita Osaka 5650871 Japan
;
'Kawahata, Masatoshi'
;Kagawa School of Pharmaceutical Sciences
Tokushima Bunri University
Shido Sanuki Kagawa 7692193 Japan
;
'Azumaya, Isao'
;Kagawa School of Pharmaceutical Sciences
Tokushima Bunri University
Shido Sanuki Kagawa 7692193 Japan
;
'Yamaguchi, Kentaro'
;Kagawa School of Pharmaceutical Sciences
Tokushima Bunri University
Shido Sanuki Kagawa 7692193 Japan
;
'Miyazawa Toshifumi'
;Department of Chemistry
Faculty of Science and Technology
Konan University
Okamoto Higashinada Kobe 6588501 Japan
;
  
data_c:\xray_data\a\a0805281dan 
 
_audit_creation_method            SHELXL-97 
_chemical_name_systematic 
; 
 ? 
; 
_chemical_name_common             ? 
_chemical_melting_point           ? 
_chemical_formula_moiety          ? 
_chemical_formula_sum 
 'C76 H74 B3 K N6 O18' 
_chemical_formula_weight          1430.94 
 
loop_ 
 _atom_type_symbol 
 _atom_type_description 
 _atom_type_scat_dispersion_real 
 _atom_type_scat_dispersion_imag 
 _atom_type_scat_source 
 'C'  'C'   0.0033   0.0016 
 'International Tables Vol C Tables 4.2.6.8 and 6.1.1.4' 
 'H'  'H'   0.0000   0.0000 
 'International Tables Vol C Tables 4.2.6.8 and 6.1.1.4' 
 'B'  'B'   0.0013   0.0007 
 'International Tables Vol C Tables 4.2.6.8 and 6.1.1.4' 
 'N'  'N'   0.0061   0.0033 
 'International Tables Vol C Tables 4.2.6.8 and 6.1.1.4' 
 'O'  'O'   0.0106   0.0060 
 'International Tables Vol C Tables 4.2.6.8 and 6.1.1.4' 
 'K'  'K'   0.2009   0.2494 
 'International Tables Vol C Tables 4.2.6.8 and 6.1.1.4' 
 
_symmetry_cell_setting            Triclinic
_symmetry_space_group_name_H-M    P-1
 
loop_ 
 _symmetry_equiv_pos_as_xyz 
 'x, y, z' 
 '-x, -y, -z' 
 
_cell_length_a                    14.5849(11) 
_cell_length_b                    16.2575(12) 
_cell_length_c                    18.6167(14) 
_cell_angle_alpha                 83.6720(10) 
_cell_angle_beta                  77.0270(10) 
_cell_angle_gamma                 67.0870(10) 
_cell_volume                      3960.9(5) 
_cell_formula_units_Z             2 
_cell_measurement_temperature     150 
_cell_measurement_reflns_used     ? 
_cell_measurement_theta_min       ? 
_cell_measurement_theta_max       ? 
 
_exptl_crystal_description        'prsimatic' 
_exptl_crystal_colour             'pale orange' 
_exptl_crystal_size_max           0.30 
_exptl_crystal_size_mid           0.20 
_exptl_crystal_size_min           0.20 
_exptl_crystal_density_meas       ? 
_exptl_crystal_density_diffrn     1.200 
_exptl_crystal_density_method     'not measured' 
_exptl_crystal_F_000              1500 
_exptl_absorpt_coefficient_mu     0.136 
_exptl_absorpt_correction_type    empirical 
_exptl_absorpt_correction_T_min   0.9603 
_exptl_absorpt_correction_T_max   0.9733 
_exptl_absorpt_process_details    'SADABS Sheldrick 1996' 
 
_exptl_special_details 
; 
 ? 
; 
 
_diffrn_ambient_temperature       150 
_diffrn_radiation_wavelength      0.71073 
_diffrn_radiation_type            MoK\a 
_diffrn_radiation_source          'fine-focus sealed tube' 
_diffrn_radiation_monochromator   graphite 
_diffrn_measurement_device_type   'Bruker APEX II CCD Area Detector' 
_diffrn_measurement_method         'phi and omega scans' 
_diffrn_detector_area_resol_mean  8.333 
_diffrn_standards_number          ? 
_diffrn_standards_interval_count  ? 
_diffrn_standards_interval_time   ? 
_diffrn_standards_decay_%         ? 
_diffrn_reflns_number             19537 
_diffrn_reflns_av_R_equivalents   0.0146 
_diffrn_reflns_av_sigmaI/netI     0.0433 
_diffrn_reflns_limit_h_min        -18 
_diffrn_reflns_limit_h_max        17 
_diffrn_reflns_limit_k_min        -20 
_diffrn_reflns_limit_k_max        16 
_diffrn_reflns_limit_l_min        -20 
_diffrn_reflns_limit_l_max        23 
_diffrn_reflns_theta_min          1.63 
_diffrn_reflns_theta_max          27.09 
_reflns_number_total              15011 
_reflns_number_gt                 10189 
_reflns_threshold_expression      >2sigma(I) 
 
_computing_data_collection        'APEX II (Bruker AXS, 2006)' 
_computing_cell_refinement        'APEX II (Bruker AXS, 2006)' 
_computing_data_reduction         'SAINT (Bruker AXS, 2004)' 
_computing_structure_solution     'SHELXS-97 (Sheldrick, 1990)' 
_computing_structure_refinement   'SHELXL-97 (Sheldrick, 1997)' 
_computing_molecular_graphics     'XSHEL (Bruker AXS,2002)' 
_computing_publication_material   ? 
 
_refine_special_details 
; 
 Refinement of F^2^ against ALL reflections.  The weighted R-factor wR and 
 goodness of fit S are based on F^2^, conventional R-factors R are based 
 on F, with F set to zero for negative F^2^. The threshold expression of 
 F^2^ > 2sigma(F^2^) is used only for calculating R-factors(gt) etc. and is 
 not relevant to the choice of reflections for refinement.  R-factors based 
 on F^2^ are statistically about twice as large as those based on F, and R- 
 factors based on ALL data will be even larger. 
; 
 
_refine_ls_structure_factor_coef  Fsqd  
_refine_ls_matrix_type            full 
_refine_ls_weighting_scheme       calc  
_refine_ls_weighting_details 
 'calc w=1/[\s^2^(Fo^2^)+(0.2000P)^2^+0.0000P] where P=(Fo^2^+2Fc^2^)/3' 
_atom_sites_solution_primary      direct 
_atom_sites_solution_secondary    difmap 
_atom_sites_solution_hydrogens    geom 
_refine_ls_hydrogen_treatment     constr 
_refine_ls_extinction_method      none 
_refine_ls_extinction_coef        ? 
_refine_ls_number_reflns          15011 
_refine_ls_number_parameters      949 
_refine_ls_number_restraints      23 
_refine_ls_R_factor_all           0.1845 
_refine_ls_R_factor_gt            0.1471 
_refine_ls_wR_factor_ref          0.4483 
_refine_ls_wR_factor_gt           0.4174 
_refine_ls_goodness_of_fit_ref    1.792 
_refine_ls_restrained_S_all       1.795 
_refine_ls_shift/su_max           5.081 
_refine_ls_shift/su_mean          0.075 
 
loop_ 
 _atom_site_label 
 _atom_site_type_symbol 
 _atom_site_fract_x 
 _atom_site_fract_y 
 _atom_site_fract_z 
 _atom_site_U_iso_or_equiv 
 _atom_site_adp_type 
 _atom_site_occupancy 
 _atom_site_symmetry_multiplicity 
 _atom_site_calc_flag 
 _atom_site_refinement_flags 
 _atom_site_disorder_assembly 
 _atom_site_disorder_group 
O18 O 0.7831(8) 0.4367(6) 0.1354(5) 0.131(3) Uani 1 1 d . . . 
K1 K 0.31060(12) 0.34114(9) 0.25031(8) 0.0511(5) Uani 1 1 d . . . 
O11 O 0.1978(3) 0.5023(2) 0.3357(2) 0.0377(10) Uani 1 1 d . . . 
C41 C 0.2198(4) 0.6330(3) 0.2177(3) 0.0250(10) Uani 1 1 d . . . 
C21 C 0.5459(4) 0.1635(3) 0.0768(3) 0.0242(10) Uani 1 1 d . . . 
C51 C 0.1222(4) 0.6296(3) 0.2579(3) 0.0278(11) Uani 1 1 d . . . 
C31 C 0.4700(4) 0.2224(3) 0.0334(3) 0.0235(10) Uani 1 1 d . . . 
C43 C 0.3824(4) 0.5729(3) 0.1319(3) 0.0278(11) Uani 1 1 d . . . 
C38 C 0.4970(4) 0.0999(3) -0.0491(3) 0.0280(11) Uani 1 1 d . . . 
H38 H 0.5392 0.0590 -0.0200 0.034 Uiso 1 1 calc R . . 
C32 C 0.4188(4) 0.3119(3) 0.0475(3) 0.0241(10) Uani 1 1 d . . . 
C42 C 0.2899(4) 0.5683(3) 0.1708(3) 0.0268(11) Uani 1 1 d . . . 
C49 C 0.2500(4) 0.7057(3) 0.2288(3) 0.0262(11) Uani 1 1 d . . . 
C33 C 0.3582(4) 0.3725(3) 0.0008(3) 0.0270(11) Uani 1 1 d . . . 
C40 C 0.3851(4) 0.2523(3) -0.0745(3) 0.0276(11) Uani 1 1 d . . . 
C1 C 0.2893(4) 0.2433(3) 0.4790(3) 0.0285(11) Uani 1 1 d . . . 
C44 C 0.4127(4) 0.6399(3) 0.1406(3) 0.0300(11) Uani 1 1 d . . . 
H44 H 0.4747 0.6412 0.1149 0.036 Uiso 1 1 calc R . . 
C11 C 0.2745(4) 0.1716(3) 0.4450(3) 0.0289(11) Uani 1 1 d . . . 
C22 C 0.5196(4) 0.1403(3) 0.1491(3) 0.0268(11) Uani 1 1 d . . . 
C37 C 0.4811(4) 0.0705(4) -0.1093(3) 0.0348(13) Uani 1 1 d . . . 
H37 H 0.5143 0.0107 -0.1216 0.042 Uiso 1 1 calc R . . 
C50 C 0.3448(4) 0.7089(3) 0.1915(3) 0.0294(11) Uani 1 1 d . . . 
C29 C 0.6528(4) 0.1295(3) 0.0453(3) 0.0263(11) Uani 1 1 d . . . 
C19 C 0.2103(4) 0.1264(3) 0.4859(3) 0.0323(12) Uani 1 1 d . . . 
C35 C 0.3686(4) 0.2183(4) -0.1358(3) 0.0321(12) Uani 1 1 d . . . 
H35 H 0.3252 0.2571 -0.1651 0.038 Uiso 1 1 calc R . . 
C39 C 0.4511(4) 0.1913(3) -0.0294(3) 0.0259(11) Uani 1 1 d . . . 
C54 C -0.0661(4) 0.6308(4) 0.3493(3) 0.0349(13) Uani 1 1 d . . . 
H54 H -0.1261 0.6318 0.3803 0.042 Uiso 1 1 calc R . . 
C59 C 0.0264(4) 0.6920(3) 0.2430(3) 0.0325(12) Uani 1 1 d . . . 
C34 C 0.3393(4) 0.3448(3) -0.0595(3) 0.0303(12) Uani 1 1 d . . . 
H34 H 0.2980 0.3852 -0.0894 0.036 Uiso 1 1 calc R . . 
C30 C 0.7256(4) 0.0773(3) 0.0883(3) 0.0358(13) Uani 1 1 d . . . 
C52 C 0.1184(4) 0.5692(3) 0.3137(3) 0.0308(12) Uani 1 1 d . . . 
C2 C 0.2478(4) 0.3313(3) 0.4590(3) 0.0295(11) Uani 1 1 d . . . 
C55 C -0.1597(5) 0.7560(4) 0.2709(4) 0.0454(16) Uani 1 1 d . . . 
H55 H -0.2207 0.7574 0.3007 0.054 Uiso 1 1 calc R . . 
C14 C 0.2552(5) 0.0288(4) 0.3810(3) 0.0383(13) Uani 1 1 d . . . 
H14 H 0.2501 -0.0179 0.3595 0.046 Uiso 1 1 calc R . . 
C3 C 0.2557(5) 0.4010(4) 0.4927(3) 0.0369(13) Uani 1 1 d . . . 
C36 C 0.4153(4) 0.1297(4) -0.1526(3) 0.0368(13) Uani 1 1 d . . . 
H36 H 0.4033 0.1089 -0.1927 0.044 Uiso 1 1 calc R . . 
C13 C 0.3161(4) 0.0708(4) 0.3444(3) 0.0343(12) Uani 1 1 d . . . 
C23 C 0.5906(4) 0.0844(3) 0.1915(3) 0.0316(12) Uani 1 1 d . . . 
C12 C 0.3231(4) 0.1430(3) 0.3754(3) 0.0285(11) Uani 1 1 d . . . 
C53 C 0.0258(4) 0.5715(4) 0.3606(3) 0.0338(12) Uani 1 1 d . . . 
C60 C -0.0665(4) 0.6917(4) 0.2876(3) 0.0358(13) Uani 1 1 d . . . 
C24 C 0.6932(4) 0.0534(4) 0.1624(3) 0.0362(13) Uani 1 1 d . . . 
H24 H 0.7401 0.0178 0.1906 0.043 Uiso 1 1 calc R . . 
C28 C 0.6889(4) 0.1501(3) -0.0291(3) 0.0304(12) Uani 1 1 d . . . 
H28 H 0.6422 0.1846 -0.0579 0.036 Uiso 1 1 calc R . . 
C10 C 0.3612(5) 0.2924(4) 0.5675(4) 0.0420(14) Uani 1 1 d . . . 
C45 C 0.3709(4) 0.7796(4) 0.2036(3) 0.0361(13) Uani 1 1 d . . . 
H45 H 0.4329 0.7819 0.1791 0.043 Uiso 1 1 calc R . . 
C20 C 0.1987(4) 0.0568(4) 0.4531(3) 0.0376(13) Uani 1 1 d . . . 
C18 C 0.1568(4) 0.1504(4) 0.5587(3) 0.0368(13) Uani 1 1 d . . . 
H18 H 0.1639 0.1954 0.5810 0.044 Uiso 1 1 calc R . . 
C58 C 0.0216(5) 0.7539(4) 0.1821(4) 0.0403(14) Uani 1 1 d . . . 
H58 H 0.0814 0.7534 0.1509 0.048 Uiso 1 1 calc R . . 
C47 C 0.2125(5) 0.8438(4) 0.2881(4) 0.0493(17) Uani 1 1 d . . . 
H47 H 0.1686 0.8896 0.3197 0.059 Uiso 1 1 calc R . . 
C27 C 0.7908(4) 0.1207(4) -0.0599(4) 0.0403(14) Uani 1 1 d . . . 
H27 H 0.8124 0.1351 -0.1088 0.048 Uiso 1 1 calc R . . 
C48 C 0.1851(4) 0.7758(4) 0.2782(3) 0.0366(13) Uani 1 1 d . . . 
H48 H 0.1231 0.7747 0.3040 0.044 Uiso 1 1 calc R . . 
C9 C 0.3497(4) 0.2219(4) 0.5361(3) 0.0329(12) Uani 1 1 d . . . 
C17 C 0.0941(4) 0.1080(4) 0.5972(4) 0.0437(15) Uani 1 1 d . . . 
H17 H 0.0607 0.1235 0.6454 0.052 Uiso 1 1 calc R . . 
C8 C 0.3949(5) 0.1347(4) 0.5611(3) 0.0429(14) Uani 1 1 d . . . 
H8 H 0.3860 0.0890 0.5410 0.051 Uiso 1 1 calc R . . 
C26 C 0.8625(5) 0.0685(5) -0.0169(4) 0.0514(17) Uani 1 1 d . . . 
H26 H 0.9315 0.0473 -0.0374 0.062 Uiso 1 1 calc R . . 
C25 C 0.8292(5) 0.0492(4) 0.0558(4) 0.0487(16) Uani 1 1 d . . . 
H25 H 0.8769 0.0164 0.0843 0.058 Uiso 1 1 calc R . . 
C46 C 0.3060(5) 0.8454(4) 0.2513(4) 0.0457(16) Uani 1 1 d . . . 
H46 H 0.3246 0.8918 0.2592 0.055 Uiso 1 1 calc R . . 
C88 C 0.3117(5) 0.3831(4) 0.5464(4) 0.0421(14) Uani 1 1 d . . . 
H88 H 0.3173 0.4290 0.5686 0.051 Uiso 1 1 calc R . . 
C56 C -0.1620(6) 0.8146(4) 0.2136(5) 0.058(2) Uani 1 1 d . . . 
H56 H -0.2239 0.8549 0.2037 0.070 Uiso 1 1 calc R . . 
C7 C 0.4535(5) 0.1132(5) 0.6155(4) 0.0547(18) Uani 1 1 d . . . 
H7 H 0.4846 0.0541 0.6303 0.066 Uiso 1 1 calc R . . 
C57 C -0.0709(5) 0.8148(4) 0.1688(4) 0.0536(18) Uani 1 1 d . . . 
H57 H -0.0726 0.8561 0.1298 0.064 Uiso 1 1 calc R . . 
C16 C 0.0811(5) 0.0421(5) 0.5636(4) 0.0563(19) Uani 1 1 d . . . 
H16 H 0.0372 0.0149 0.5888 0.068 Uiso 1 1 calc R . . 
C15 C 0.1336(5) 0.0168(5) 0.4926(4) 0.0480(16) Uani 1 1 d . . . 
H15 H 0.1250 -0.0280 0.4710 0.058 Uiso 1 1 calc R . . 
C5 C 0.4175(6) 0.2699(6) 0.6248(5) 0.065(2) Uani 1 1 d . . . 
H5 H 0.4230 0.3153 0.6478 0.078 Uiso 1 1 calc R . . 
C6 C 0.4644(6) 0.1822(6) 0.6473(5) 0.065(2) Uani 1 1 d . . . 
H6 H 0.5032 0.1690 0.6836 0.078 Uiso 1 1 calc R . . 
C70 C 0.2557(11) 0.0976(10) 0.1029(18) 0.267(17) Uani 1 1 d . . . 
H70A H 0.2144 0.0859 0.0749 0.400 Uiso 1 1 calc R . . 
H70B H 0.2663 0.0557 0.1436 0.400 Uiso 1 1 calc R . . 
H70C H 0.3200 0.0917 0.0718 0.400 Uiso 1 1 calc R . . 
C69 C 0.1639(17) 0.2516(16) 0.0774(15) 0.229(12) Uani 1 1 d . . . 
H69A H 0.1511 0.2255 0.0387 0.344 Uiso 1 1 calc R . . 
H69B H 0.2101 0.2809 0.0566 0.344 Uiso 1 1 calc R . . 
H69C H 0.1011 0.2945 0.1023 0.344 Uiso 1 1 calc R . . 
C62 C 0.7053(11) 0.3355(6) 0.0278(6) 0.112(4) Uani 1 1 d . . . 
H62A H 0.7636 0.2878 0.0410 0.168 Uiso 1 1 calc R . . 
H62B H 0.7272 0.3730 -0.0098 0.168 Uiso 1 1 calc R . . 
H62C H 0.6649 0.3110 0.0097 0.168 Uiso 1 1 calc R . . 
C61 C 0.6279(7) 0.3263(8) 0.1546(6) 0.093(3) Uani 1 1 d . . . 
H61A H 0.5870 0.2969 0.1438 0.140 Uiso 1 1 calc R . . 
H61B H 0.5930 0.3613 0.1978 0.140 Uiso 1 1 calc R . . 
H61C H 0.6916 0.2824 0.1631 0.140 Uiso 1 1 calc R . . 
C71 C 0.5547(8) 0.2470(7) 0.3876(8) 0.154(8) Uani 1 1 d D . . 
H71 H 0.5229 0.2313 0.3564 0.185 Uiso 1 1 calc R . . 
C74 C 1.0802(11) 0.5533(13) 0.0375(14) 0.145(7) Uani 1 1 d . . . 
H74 H 1.1476 0.5178 0.0384 0.174 Uiso 1 1 calc R . . 
C75 C 0.9074(8) 0.6091(10) 0.1025(9) 0.129(5) Uani 1 1 d . . . 
H75A H 0.8664 0.5742 0.1062 0.193 Uiso 1 1 calc R . . 
H75B H 0.8979 0.6493 0.0605 0.193 Uiso 1 1 calc R . . 
H75C H 0.8877 0.6428 0.1464 0.193 Uiso 1 1 calc R . . 
C76 C 1.0415(11) 0.4949(10) 0.1523(12) 0.159(8) Uani 1 1 d . . . 
H76A H 1.0422 0.5287 0.1912 0.239 Uiso 1 1 calc R . . 
H76B H 1.1085 0.4514 0.1361 0.239 Uiso 1 1 calc R . . 
H76C H 0.9951 0.4651 0.1701 0.239 Uiso 1 1 calc R . . 
O7 O 0.4223(3) 0.3560(2) 0.1045(2) 0.0292(8) Uani 1 1 d . . . 
O5 O 0.4248(3) 0.1637(2) 0.19185(19) 0.0313(8) Uani 1 1 d . . . 
O3 O 0.3872(3) 0.1758(2) 0.3271(2) 0.0345(9) Uani 1 1 d . . . 
O9 O 0.2802(3) 0.4937(2) 0.1530(2) 0.0321(9) Uani 1 1 d . . . 
O10 O 0.4323(3) 0.5039(2) 0.0845(2) 0.0357(9) Uani 1 1 d . . . 
O8 O 0.3281(3) 0.4576(2) 0.0230(2) 0.0348(9) Uani 1 1 d . . . 
O6 O 0.5442(3) 0.0677(3) 0.2593(2) 0.0397(10) Uani 1 1 d . . . 
O4 O 0.3796(3) 0.0527(3) 0.2768(2) 0.0402(10) Uani 1 1 d . . . 
O1 O 0.1914(3) 0.3664(2) 0.4056(2) 0.0380(10) Uani 1 1 d . . . 
O2 O 0.1994(3) 0.4813(3) 0.4665(2) 0.0411(10) Uani 1 1 d . . . 
O12 O 0.0458(3) 0.5087(3) 0.4160(2) 0.0403(10) Uani 1 1 d . . . 
B1 B 0.1572(5) 0.4649(4) 0.4069(4) 0.0373(15) Uani 1 1 d . . . 
B2 B 0.4346(5) 0.1140(4) 0.2638(3) 0.0336(14) Uani 1 1 d . . . 
B3 B 0.3669(5) 0.4520(4) 0.0911(4) 0.0309(13) Uani 1 1 d . . . 
N1 N 0.6470(5) 0.3864(4) 0.0903(5) 0.073(2) Uani 1 1 d . . . 
H1A H 0.5873 0.4250 0.0801 0.088 Uiso 1 1 calc R . . 
H1B H 0.6800 0.4181 0.1020 0.088 Uiso 1 1 calc R . . 
N6 N 1.0110(8) 0.5516(6) 0.0940(8) 0.113(4) Uani 1 1 d . . . 
O14 O 0.1817(13) 0.2868(8) 0.1963(16) 0.279(14) Uani 1 1 d . . . 
O16 O 1.0593(8) 0.6017(11) -0.0193(9) 0.178(5) Uani 1 1 d . . . 
C63 C 0.9979(12) 0.112(2) 0.2125(10) 0.41(3) Uani 1 1 d D . . 
H63A H 0.9847 0.0694 0.2494 0.612 Uiso 1 1 calc R . . 
H63B H 1.0693 0.0913 0.1921 0.612 Uiso 1 1 calc R . . 
H63C H 0.9615 0.1171 0.1740 0.612 Uiso 1 1 calc R . . 
C72 C 0.6654(16) 0.2070(13) 0.4790(15) 0.265(15) Uani 1 1 d D . . 
H72A H 0.6249 0.2665 0.4959 0.397 Uiso 1 1 calc R . . 
H72B H 0.7316 0.2044 0.4539 0.397 Uiso 1 1 calc R . . 
H72C H 0.6718 0.1658 0.5204 0.397 Uiso 1 1 calc R . . 
O15 O 0.5397(10) 0.3218(9) 0.3907(9) 0.213(6) Uani 1 1 d D . . 
N2 N 0.962(3) 0.204(2) 0.248(2) 1.09(14) Uani 1 1 d D . . 
H2A H 1.0132 0.2243 0.2387 1.311 Uiso 1 1 calc R . . 
H2B H 0.9412 0.2002 0.2968 1.311 Uiso 1 1 calc R . . 
O13 O 0.4271(5) 0.4211(4) 0.2878(4) 0.091(2) Uani 1 1 d D . . 
C66 C 0.5356(17) 0.5397(11) 0.2874(10) 0.46(3) Uani 1 1 d D . . 
H66A H 0.5473 0.5182 0.2388 0.684 Uiso 1 1 calc R . . 
H66B H 0.5859 0.4989 0.3134 0.684 Uiso 1 1 calc R . . 
H66C H 0.5400 0.5974 0.2836 0.684 Uiso 1 1 calc R . . 
C73 C 0.6239(7) 0.0894(6) 0.4208(6) 0.081(3) Uani 1 1 d D . . 
H73A H 0.5704 0.0883 0.3993 0.122 Uiso 1 1 calc R . . 
H73B H 0.6194 0.0626 0.4695 0.122 Uiso 1 1 calc R . . 
H73C H 0.6884 0.0566 0.3908 0.122 Uiso 1 1 calc R . . 
N5 N 0.6137(9) 0.1817(8) 0.4253(10) 0.35(2) Uani 1 1 d D . . 
C64 C 0.873(4) 0.266(3) 0.210(3) 1.08(12) Uani 1 1 d D . . 
H64A H 0.8832 0.3205 0.1932 1.614 Uiso 1 1 calc R . . 
H64B H 0.8102 0.2795 0.2451 1.614 Uiso 1 1 calc R . . 
H64C H 0.8713 0.2365 0.1689 1.614 Uiso 1 1 calc R . . 
O17 O 0.722(3) 0.4152(10) 0.3824(14) 0.51(3) Uani 1 1 d . . . 
N3 N 0.4305(16) 0.5468(15) 0.3289(10) 2.3(3) Uani 1 1 d D . . 
C67 C 0.368(2) 0.6269(13) 0.3797(11) 0.269(15) Uani 1 1 d D . . 
H67A H 0.3047 0.6597 0.3649 0.404 Uiso 1 1 calc R . . 
H67B H 0.4057 0.6651 0.3760 0.404 Uiso 1 1 calc R . . 
H67C H 0.3564 0.6056 0.4297 0.404 Uiso 1 1 calc R . . 
C65 C 0.3946(15) 0.4864(11) 0.3220(9) 0.83(9) Uani 1 1 d D . . 
H65 H 0.3298 0.4975 0.3500 1.001 Uiso 1 1 calc R . . 
C68 C 0.1896(17) 0.237(4) 0.2062(13) 0.40(3) Uani 1 1 d . . . 
H68 H 0.1892 0.2117 0.2535 0.478 Uiso 1 1 calc R . . 
N4 N 0.2075(8) 0.1830(9) 0.1289(15) 0.207(10) Uani 1 1 d . . . 
 
loop_ 
 _atom_site_aniso_label 
 _atom_site_aniso_U_11 
 _atom_site_aniso_U_22 
 _atom_site_aniso_U_33 
 _atom_site_aniso_U_23 
 _atom_site_aniso_U_13 
 _atom_site_aniso_U_12 
O18 0.183(9) 0.111(6) 0.155(8) 0.038(5) -0.110(7) -0.083(6) 
K1 0.0613(10) 0.0315(7) 0.0409(8) 0.0030(6) 0.0017(7) -0.0040(6) 
O11 0.036(2) 0.0265(19) 0.035(2) 0.0095(16) 0.0001(17) -0.0019(16) 
C41 0.024(2) 0.020(2) 0.025(3) 0.0018(19) -0.003(2) -0.0039(19) 
C21 0.027(2) 0.019(2) 0.023(3) -0.0037(19) -0.005(2) -0.0029(19) 
C51 0.033(3) 0.019(2) 0.031(3) -0.003(2) -0.004(2) -0.010(2) 
C31 0.024(2) 0.022(2) 0.022(2) -0.0003(19) -0.0021(19) -0.009(2) 
C43 0.030(3) 0.021(2) 0.023(3) -0.0018(19) -0.002(2) -0.001(2) 
C38 0.032(3) 0.024(2) 0.028(3) -0.001(2) -0.007(2) -0.010(2) 
C32 0.025(2) 0.024(2) 0.022(2) 0.0008(19) -0.0056(19) -0.008(2) 
C42 0.034(3) 0.016(2) 0.027(3) 0.0006(19) -0.006(2) -0.005(2) 
C49 0.029(3) 0.023(2) 0.024(3) -0.002(2) -0.004(2) -0.006(2) 
C33 0.026(2) 0.019(2) 0.031(3) -0.002(2) -0.002(2) -0.005(2) 
C40 0.025(2) 0.031(3) 0.027(3) 0.001(2) -0.006(2) -0.010(2) 
C1 0.032(3) 0.028(3) 0.024(3) 0.004(2) -0.002(2) -0.012(2) 
C44 0.037(3) 0.025(3) 0.026(3) -0.001(2) -0.001(2) -0.011(2) 
C11 0.030(3) 0.028(3) 0.027(3) 0.004(2) -0.009(2) -0.009(2) 
C22 0.028(3) 0.018(2) 0.031(3) -0.002(2) -0.004(2) -0.0047(19) 
C37 0.046(3) 0.024(3) 0.034(3) -0.006(2) -0.005(3) -0.014(2) 
C50 0.034(3) 0.025(3) 0.026(3) -0.003(2) -0.003(2) -0.008(2) 
C29 0.024(2) 0.020(2) 0.031(3) -0.003(2) -0.004(2) -0.0041(19) 
C19 0.033(3) 0.027(3) 0.034(3) 0.001(2) -0.005(2) -0.011(2) 
C35 0.032(3) 0.038(3) 0.028(3) -0.002(2) -0.010(2) -0.013(2) 
C39 0.027(2) 0.022(2) 0.025(3) -0.001(2) -0.001(2) -0.008(2) 
C54 0.030(3) 0.030(3) 0.041(3) -0.009(2) 0.001(2) -0.010(2) 
C59 0.033(3) 0.021(2) 0.042(3) -0.001(2) -0.010(2) -0.007(2) 
C34 0.031(3) 0.028(3) 0.031(3) 0.000(2) -0.009(2) -0.010(2) 
C30 0.037(3) 0.024(3) 0.039(3) 0.000(2) -0.005(2) -0.005(2) 
C52 0.030(3) 0.022(2) 0.033(3) -0.003(2) 0.000(2) -0.005(2) 
C2 0.035(3) 0.029(3) 0.025(3) 0.003(2) -0.007(2) -0.013(2) 
C55 0.032(3) 0.038(3) 0.067(4) -0.006(3) -0.017(3) -0.009(3) 
C14 0.047(3) 0.038(3) 0.035(3) -0.007(2) -0.002(3) -0.022(3) 
C3 0.044(3) 0.033(3) 0.035(3) 0.003(2) -0.003(3) -0.020(3) 
C36 0.045(3) 0.043(3) 0.030(3) -0.008(2) -0.010(3) -0.022(3) 
C13 0.038(3) 0.031(3) 0.030(3) 0.000(2) -0.006(2) -0.010(2) 
C23 0.040(3) 0.024(3) 0.028(3) 0.001(2) -0.008(2) -0.009(2) 
C12 0.035(3) 0.021(2) 0.025(3) 0.001(2) -0.005(2) -0.007(2) 
C53 0.041(3) 0.028(3) 0.031(3) -0.002(2) 0.001(2) -0.016(2) 
C60 0.030(3) 0.025(3) 0.050(4) -0.011(2) -0.007(3) -0.006(2) 
C24 0.035(3) 0.030(3) 0.034(3) 0.001(2) -0.011(2) 0.000(2) 
C28 0.029(3) 0.026(3) 0.031(3) 0.001(2) -0.004(2) -0.007(2) 
C10 0.041(3) 0.055(4) 0.042(4) 0.005(3) -0.017(3) -0.028(3) 
C45 0.038(3) 0.038(3) 0.036(3) -0.002(2) -0.003(2) -0.020(3) 
C20 0.041(3) 0.037(3) 0.037(3) -0.005(2) -0.006(3) -0.017(3) 
C18 0.034(3) 0.038(3) 0.034(3) 0.000(2) -0.003(2) -0.011(2) 
C58 0.039(3) 0.031(3) 0.049(4) 0.005(3) -0.013(3) -0.011(2) 
C47 0.046(4) 0.045(4) 0.054(4) -0.032(3) 0.004(3) -0.013(3) 
C27 0.029(3) 0.040(3) 0.041(3) 0.005(3) 0.001(2) -0.007(2) 
C48 0.030(3) 0.039(3) 0.038(3) -0.016(3) -0.001(2) -0.009(2) 
C9 0.030(3) 0.041(3) 0.029(3) 0.007(2) -0.007(2) -0.017(2) 
C17 0.036(3) 0.052(4) 0.041(4) -0.005(3) 0.004(3) -0.020(3) 
C8 0.039(3) 0.051(4) 0.037(3) 0.007(3) -0.010(3) -0.015(3) 
C26 0.026(3) 0.053(4) 0.057(4) 0.006(3) 0.000(3) -0.003(3) 
C25 0.031(3) 0.046(4) 0.054(4) 0.005(3) -0.008(3) 0.001(3) 
C46 0.050(4) 0.045(4) 0.049(4) -0.017(3) 0.001(3) -0.027(3) 
C88 0.051(4) 0.045(3) 0.047(4) 0.000(3) -0.017(3) -0.032(3) 
C56 0.051(4) 0.034(3) 0.092(6) 0.010(4) -0.037(4) -0.009(3) 
C7 0.048(4) 0.062(4) 0.047(4) 0.020(3) -0.019(3) -0.013(3) 
C57 0.050(4) 0.037(3) 0.077(5) 0.024(3) -0.035(4) -0.014(3) 
C16 0.052(4) 0.067(5) 0.053(4) -0.008(4) 0.012(3) -0.035(4) 
C15 0.051(4) 0.053(4) 0.050(4) -0.004(3) -0.003(3) -0.033(3) 
C5 0.074(5) 0.069(5) 0.074(5) 0.009(4) -0.050(5) -0.033(4) 
C6 0.061(5) 0.090(6) 0.062(5) 0.017(4) -0.037(4) -0.038(4) 
C70 0.068(8) 0.096(11) 0.57(5) -0.076(19) 0.042(16) -0.003(8) 
C69 0.179(19) 0.18(2) 0.29(3) 0.11(2) -0.001(19) -0.080(16) 
C62 0.210(13) 0.045(5) 0.080(7) 0.012(5) -0.074(8) -0.026(6) 
C61 0.071(6) 0.131(10) 0.080(7) -0.032(7) -0.003(5) -0.039(6) 
C71 0.101(9) 0.059(6) 0.33(2) 0.070(10) -0.093(11) -0.048(6) 
C74 0.046(7) 0.161(16) 0.21(2) -0.044(14) -0.032(10) -0.001(8) 
C75 0.070(7) 0.137(11) 0.157(13) -0.026(10) -0.017(8) -0.013(7) 
C76 0.101(10) 0.105(11) 0.29(2) -0.063(14) -0.060(13) -0.034(8) 
O7 0.0354(19) 0.0195(17) 0.0278(19) -0.0035(14) -0.0068(16) -0.0040(15) 
O5 0.032(2) 0.0307(19) 0.0231(19) 0.0028(15) -0.0025(15) -0.0060(16) 
O3 0.050(2) 0.0277(19) 0.025(2) -0.0007(15) -0.0026(17) -0.0160(17) 
O9 0.038(2) 0.0174(17) 0.036(2) -0.0043(15) 0.0007(17) -0.0079(15) 
O10 0.041(2) 0.0259(19) 0.033(2) -0.0086(16) 0.0037(17) -0.0088(16) 
O8 0.041(2) 0.0195(17) 0.038(2) -0.0001(15) -0.0135(18) -0.0014(15) 
O6 0.046(2) 0.036(2) 0.026(2) 0.0078(16) -0.0079(17) -0.0059(18) 
O4 0.060(3) 0.030(2) 0.026(2) -0.0052(16) 0.0024(18) -0.0168(19) 
O1 0.057(3) 0.0271(19) 0.026(2) 0.0048(15) -0.0152(18) -0.0090(18) 
O2 0.054(3) 0.031(2) 0.040(2) 0.0008(17) -0.009(2) -0.0181(19) 
O12 0.045(2) 0.030(2) 0.038(2) 0.0076(17) -0.0017(18) -0.0108(18) 
B1 0.047(4) 0.029(3) 0.030(3) 0.004(3) -0.001(3) -0.012(3) 
B2 0.039(3) 0.028(3) 0.026(3) -0.002(2) -0.002(3) -0.005(3) 
B3 0.035(3) 0.020(3) 0.033(3) -0.004(2) 0.000(3) -0.007(2) 
N1 0.058(4) 0.053(4) 0.107(6) -0.019(4) -0.037(4) -0.005(3) 
N6 0.086(7) 0.072(6) 0.180(12) -0.034(7) -0.082(8) 0.010(5) 
O14 0.227(16) 0.082(7) 0.58(4) -0.068(13) -0.18(2) -0.047(8) 
O16 0.088(7) 0.207(14) 0.229(15) -0.020(11) -0.041(8) -0.036(8) 
C63 0.073(10) 0.95(10) 0.106(14) -0.14(3) 0.012(10) -0.08(2) 
C72 0.20(2) 0.152(17) 0.47(4) -0.09(2) -0.19(3) 0.004(14) 
O15 0.192(13) 0.187(13) 0.280(18) 0.073(12) -0.089(12) -0.089(11) 
N2 0.74(12) 0.85(12) 1.6(2) -1.00(15) 0.89(16) -0.57(11) 
O13 0.075(4) 0.070(4) 0.125(6) -0.013(4) -0.022(4) -0.022(3) 
C66 0.95(8) 0.074(10) 0.41(4) -0.037(16) -0.55(5) -0.03(2) 
C73 0.080(6) 0.066(6) 0.091(7) 0.013(5) -0.012(5) -0.027(5) 
N5 0.182(14) 0.181(15) 0.81(6) 0.28(2) -0.32(3) -0.143(13) 
C64 1.10(16) 1.43(19) 1.26(17) 1.29(17) -1.00(15) -1.00(16) 
O17 0.94(7) 0.104(11) 0.40(3) -0.099(14) 0.16(4) -0.24(3) 
N3 2.0(3) 2.0(4) 2.0(3) -1.0(3) 2.0(3) -1.0(3) 
C67 0.50(5) 0.21(2) 0.140(16) -0.067(15) -0.04(2) -0.18(3) 
C65 0.63(8) 0.75(9) 0.18(3) 0.04(4) 0.11(4) 0.63(8) 
C68 0.094(14) 1.00(10) 0.124(16) 0.09(3) -0.026(12) -0.25(3) 
N4 0.061(6) 0.097(8) 0.40(3) 0.033(13) 0.043(11) -0.017(6) 
 
_geom_special_details 
; 
 All esds (except the esd in the dihedral angle between two l.s. planes) 
 are estimated using the full covariance matrix.  The cell esds are taken 
 into account individually in the estimation of esds in distances, angles 
 and torsion angles; correlations between esds in cell parameters are only 
 used when they are defined by crystal symmetry.  An approximate (isotropic) 
 treatment of cell esds is used for estimating esds involving l.s. planes. 
; 
 
loop_ 
 _geom_bond_atom_site_label_1 
 _geom_bond_atom_site_label_2 
 _geom_bond_distance 
 _geom_bond_site_symmetry_2 
 _geom_bond_publ_flag 
K1 O13 2.742(7) . ? 
K1 O14 2.769(15) . ? 
K1 O3 2.836(4) . ? 
K1 O9 2.855(4) . ? 
K1 O7 2.874(4) . ? 
K1 O5 2.902(4) . ? 
K1 O11 2.913(4) . ? 
K1 O1 3.000(4) . ? 
K1 B3 3.405(6) . ? 
K1 B2 3.431(6) . ? 
K1 B1 3.523(7) . ? 
O11 C52 1.351(6) . ? 
O11 B1 1.494(7) . ? 
C41 C42 1.369(7) . ? 
C41 C49 1.461(7) . ? 
C41 C51 1.471(7) . ? 
C21 C22 1.368(7) . ? 
C21 C29 1.439(7) . ? 
C21 C31 1.483(7) . ? 
C51 C52 1.356(8) . ? 
C51 C59 1.437(7) . ? 
C31 C32 1.376(7) . ? 
C31 C39 1.444(7) . ? 
C43 O10 1.364(6) . ? 
C43 C44 1.362(7) . ? 
C43 C42 1.407(7) . ? 
C38 C37 1.364(7) . ? 
C38 C39 1.422(7) . ? 
C38 H38 0.9300 . ? 
C32 O7 1.364(6) . ? 
C32 C33 1.410(7) . ? 
C42 O9 1.358(6) . ? 
C49 C50 1.419(7) . ? 
C49 C48 1.429(7) . ? 
C33 O8 1.360(6) . ? 
C33 C34 1.373(7) . ? 
C40 C34 1.418(7) . ? 
C40 C35 1.426(7) . ? 
C40 C39 1.432(7) . ? 
C1 C2 1.364(7) . ? 
C1 C9 1.458(8) . ? 
C1 C11 1.491(7) . ? 
C44 C50 1.444(7) . ? 
C44 H44 0.9300 . ? 
C11 C12 1.364(7) . ? 
C11 C19 1.447(7) . ? 
C22 O5 1.362(6) . ? 
C22 C23 1.412(7) . ? 
C37 C36 1.398(8) . ? 
C37 H37 0.9300 . ? 
C50 C45 1.396(7) . ? 
C29 C30 1.420(8) . ? 
C29 C28 1.419(7) . ? 
C19 C18 1.415(8) . ? 
C19 C20 1.424(8) . ? 
C35 C36 1.370(8) . ? 
C35 H35 0.9300 . ? 
C54 C53 1.358(8) . ? 
C54 C60 1.430(9) . ? 
C54 H54 0.9300 . ? 
C59 C58 1.427(8) . ? 
C59 C60 1.422(8) . ? 
C34 H34 0.9300 . ? 
C30 C25 1.404(8) . ? 
C30 C24 1.418(8) . ? 
C52 C53 1.424(7) . ? 
C2 O1 1.366(6) . ? 
C2 C3 1.408(8) . ? 
C55 C56 1.348(10) . ? 
C55 C60 1.432(8) . ? 
C55 H55 0.9300 . ? 
C14 C13 1.348(8) . ? 
C14 C20 1.426(8) . ? 
C14 H14 0.9300 . ? 
C3 O2 1.349(7) . ? 
C3 C88 1.368(9) . ? 
C36 H36 0.9300 . ? 
C13 O4 1.369(7) . ? 
C13 C12 1.411(7) . ? 
C23 O6 1.346(7) . ? 
C23 C24 1.377(8) . ? 
C12 O3 1.369(6) . ? 
C53 O12 1.365(7) . ? 
C24 H24 0.9300 . ? 
C28 C27 1.375(7) . ? 
C28 H28 0.9300 . ? 
C10 C9 1.423(8) . ? 
C10 C5 1.421(9) . ? 
C10 C88 1.421(9) . ? 
C45 C46 1.369(8) . ? 
C45 H45 0.9300 . ? 
C20 C15 1.389(8) . ? 
C18 C17 1.383(8) . ? 
C18 H18 0.9300 . ? 
C58 C57 1.385(8) . ? 
C58 H58 0.9300 . ? 
C47 C48 1.357(8) . ? 
C47 C46 1.391(9) . ? 
C47 H47 0.9300 . ? 
C27 C26 1.411(9) . ? 
C27 H27 0.9300 . ? 
C48 H48 0.9300 . ? 
C9 C8 1.388(8) . ? 
C17 C16 1.391(9) . ? 
C17 H17 0.9300 . ? 
C8 C7 1.398(9) . ? 
C8 H8 0.9300 . ? 
C26 C25 1.376(10) . ? 
C26 H26 0.9300 . ? 
C25 H25 0.9300 . ? 
C46 H46 0.9300 . ? 
C88 H88 0.9300 . ? 
C56 C57 1.402(10) . ? 
C56 H56 0.9300 . ? 
C7 C6 1.400(11) . ? 
C7 H7 0.9300 . ? 
C57 H57 0.9300 . ? 
C16 C15 1.386(9) . ? 
C16 H16 0.9300 . ? 
C15 H15 0.9300 . ? 
C5 C6 1.384(11) . ? 
C5 H5 0.9300 . ? 
C6 H6 0.9300 . ? 
C70 N4 1.37(2) . ? 
C70 H70A 0.9604 . ? 
C70 H70B 0.9604 . ? 
C70 H70C 0.9604 . ? 
C69 N4 1.43(3) . ? 
C69 H69A 0.9636 . ? 
C69 H69B 0.9637 . ? 
C69 H69C 0.9637 . ? 
C62 N1 1.407(12) . ? 
C62 H62A 0.9600 . ? 
C62 H62B 0.9600 . ? 
C62 H62C 0.9600 . ? 
C61 N1 1.506(13) . ? 
C61 H61A 0.9600 . ? 
C61 H61B 0.9600 . ? 
C61 H61C 0.9600 . ? 
C71 O15 1.154(12) . ? 
C71 N5 1.324(12) . ? 
C71 H71 0.9300 . ? 
C74 O16 1.27(2) . ? 
C74 N6 1.29(2) . ? 
C74 H74 0.9300 . ? 
C75 N6 1.417(14) . ? 
C75 H75A 0.9600 . ? 
C75 H75B 0.9600 . ? 
C75 H75C 0.9600 . ? 
C76 N6 1.38(2) . ? 
C76 H76A 0.9601 . ? 
C76 H76B 0.9601 . ? 
C76 H76C 0.9601 . ? 
O7 B3 1.474(7) . ? 
O5 B2 1.491(7) . ? 
O3 B2 1.494(7) . ? 
O9 B3 1.495(7) . ? 
O10 B3 1.479(7) . ? 
O8 B3 1.479(8) . ? 
O6 B2 1.464(8) . ? 
O4 B2 1.476(8) . ? 
O1 B1 1.481(7) . ? 
O2 B1 1.477(8) . ? 
O12 B1 1.475(8) . ? 
N1 H1A 0.9000 . ? 
N1 H1B 0.9000 . ? 
O14 C68 0.78(6) . ? 
C63 N2 1.552(19) . ? 
C63 H63A 0.9600 . ? 
C63 H63B 0.9600 . ? 
C63 H63C 0.9600 . ? 
C72 N5 1.552(15) . ? 
C72 H72A 0.9622 . ? 
C72 H72B 0.9621 . ? 
C72 H72C 0.9622 . ? 
N2 C64 1.56(2) . ? 
N2 H2A 0.9000 . ? 
N2 H2B 0.9000 . ? 
O13 C65 1.174(15) . ? 
C66 N3 1.521(18) . ? 
C66 H66A 0.9778 . ? 
C66 H66B 0.9778 . ? 
C66 H66C 0.9779 . ? 
C73 N5 1.459(12) . ? 
C73 H73A 0.9600 . ? 
C73 H73B 0.9600 . ? 
C73 H73C 0.9600 . ? 
C64 H64A 0.9603 . ? 
C64 H64B 0.9673 . ? 
C64 H64C 0.9605 . ? 
N3 C65 1.309(18) . ? 
N3 C67 1.540(17) . ? 
C67 H67A 0.9606 . ? 
C67 H67B 0.9606 . ? 
C67 H67C 0.9606 . ? 
C65 H65 0.9300 . ? 
C68 N4 1.69(4) . ? 
C68 H68 0.9300 . ? 
 
loop_ 
 _geom_angle_atom_site_label_1 
 _geom_angle_atom_site_label_2 
 _geom_angle_atom_site_label_3 
 _geom_angle 
 _geom_angle_site_symmetry_1 
 _geom_angle_site_symmetry_3 
 _geom_angle_publ_flag 
O13 K1 O14 169.8(5) . . ? 
O13 K1 O3 98.05(17) . . ? 
O14 K1 O3 92.0(4) . . ? 
O13 K1 O9 76.76(18) . . ? 
O14 K1 O9 93.1(5) . . ? 
O3 K1 O9 166.65(12) . . ? 
O13 K1 O7 82.55(18) . . ? 
O14 K1 O7 91.9(6) . . ? 
O3 K1 O7 116.39(11) . . ? 
O9 K1 O7 51.15(10) . . ? 
O13 K1 O5 114.34(17) . . ? 
O14 K1 O5 71.4(3) . . ? 
O3 K1 O5 50.89(10) . . ? 
O9 K1 O5 119.73(11) . . ? 
O7 K1 O5 70.98(10) . . ? 
O13 K1 O11 64.81(17) . . ? 
O14 K1 O11 111.2(4) . . ? 
O3 K1 O11 118.45(12) . . ? 
O9 K1 O11 70.83(10) . . ? 
O7 K1 O11 118.62(11) . . ? 
O5 K1 O11 169.33(12) . . ? 
O13 K1 O1 88.13(19) . . ? 
O14 K1 O1 96.0(6) . . ? 
O3 K1 O1 73.20(11) . . ? 
O9 K1 O1 118.40(11) . . ? 
O7 K1 O1 167.41(11) . . ? 
O5 K1 O1 120.90(11) . . ? 
O11 K1 O1 49.18(10) . . ? 
O13 K1 B3 77.7(2) . . ? 
O14 K1 B3 93.6(6) . . ? 
O3 K1 B3 141.48(13) . . ? 
O9 K1 B3 25.77(12) . . ? 
O7 K1 B3 25.40(11) . . ? 
O5 K1 B3 95.47(12) . . ? 
O11 K1 B3 94.67(12) . . ? 
O1 K1 B3 143.56(13) . . ? 
O13 K1 B2 108.26(19) . . ? 
O14 K1 B2 80.5(3) . . ? 
O3 K1 B2 25.38(13) . . ? 
O9 K1 B2 144.64(13) . . ? 
O7 K1 B2 94.05(13) . . ? 
O5 K1 B2 25.53(12) . . ? 
O11 K1 B2 143.81(14) . . ? 
O1 K1 B2 96.90(13) . . ? 
B3 K1 B2 119.35(15) . . ? 
O13 K1 B1 75.7(2) . . ? 
O14 K1 B1 104.5(5) . . ? 
O3 K1 B1 96.08(13) . . ? 
O9 K1 B1 94.53(13) . . ? 
O7 K1 B1 143.15(13) . . ? 
O5 K1 B1 145.43(13) . . ? 
O11 K1 B1 24.57(13) . . ? 
O1 K1 B1 24.61(12) . . ? 
B3 K1 B1 119.10(15) . . ? 
B2 K1 B1 120.78(15) . . ? 
C52 O11 B1 107.2(4) . . ? 
C52 O11 K1 121.2(3) . . ? 
B1 O11 K1 101.2(3) . . ? 
C42 C41 C49 115.4(4) . . ? 
C42 C41 C51 123.8(5) . . ? 
C49 C41 C51 120.7(4) . . ? 
C22 C21 C29 115.9(5) . . ? 
C22 C21 C31 122.7(4) . . ? 
C29 C21 C31 121.4(4) . . ? 
C52 C51 C59 116.5(5) . . ? 
C52 C51 C41 121.0(5) . . ? 
C59 C51 C41 122.5(5) . . ? 
C32 C31 C39 116.0(4) . . ? 
C32 C31 C21 121.6(4) . . ? 
C39 C31 C21 122.2(4) . . ? 
O10 C43 C44 127.0(5) . . ? 
O10 C43 C42 110.3(4) . . ? 
C44 C43 C42 122.7(4) . . ? 
C37 C38 C39 122.0(5) . . ? 
C37 C38 H38 119.0 . . ? 
C39 C38 H38 119.0 . . ? 
O7 C32 C31 126.7(4) . . ? 
O7 C32 C33 110.2(4) . . ? 
C31 C32 C33 123.1(5) . . ? 
O9 C42 C41 126.3(5) . . ? 
O9 C42 C43 110.3(4) . . ? 
C41 C42 C43 123.3(5) . . ? 
C50 C49 C48 117.7(5) . . ? 
C50 C49 C41 121.4(4) . . ? 
C48 C49 C41 120.9(5) . . ? 
O8 C33 C34 127.8(5) . . ? 
O8 C33 C32 110.2(4) . . ? 
C34 C33 C32 122.0(5) . . ? 
C34 C40 C35 120.8(5) . . ? 
C34 C40 C39 120.7(5) . . ? 
C35 C40 C39 118.4(5) . . ? 
C2 C1 C9 116.6(5) . . ? 
C2 C1 C11 122.5(5) . . ? 
C9 C1 C11 120.9(5) . . ? 
C43 C44 C50 117.4(5) . . ? 
C43 C44 H44 121.3 . . ? 
C50 C44 H44 121.3 . . ? 
C12 C11 C19 116.5(5) . . ? 
C12 C11 C1 122.3(5) . . ? 
C19 C11 C1 121.1(5) . . ? 
O5 C22 C21 127.8(5) . . ? 
O5 C22 C23 108.6(4) . . ? 
C21 C22 C23 123.6(5) . . ? 
C38 C37 C36 120.4(5) . . ? 
C38 C37 H37 119.8 . . ? 
C36 C37 H37 119.8 . . ? 
C45 C50 C49 119.7(5) . . ? 
C45 C50 C44 120.6(5) . . ? 
C49 C50 C44 119.7(5) . . ? 
C30 C29 C28 118.0(5) . . ? 
C30 C29 C21 121.2(5) . . ? 
C28 C29 C21 120.8(5) . . ? 
C18 C19 C20 118.4(5) . . ? 
C18 C19 C11 121.2(5) . . ? 
C20 C19 C11 120.4(5) . . ? 
C36 C35 C40 121.5(5) . . ? 
C36 C35 H35 119.2 . . ? 
C40 C35 H35 119.2 . . ? 
C38 C39 C40 117.7(5) . . ? 
C38 C39 C31 121.8(5) . . ? 
C40 C39 C31 120.5(4) . . ? 
C53 C54 C60 117.1(5) . . ? 
C53 C54 H54 121.4 . . ? 
C60 C54 H54 121.5 . . ? 
C58 C59 C60 118.2(5) . . ? 
C58 C59 C51 121.1(5) . . ? 
C60 C59 C51 120.7(5) . . ? 
C33 C34 C40 117.4(5) . . ? 
C33 C34 H34 121.3 . . ? 
C40 C34 H34 121.3 . . ? 
C25 C30 C29 118.9(5) . . ? 
C25 C30 C24 121.0(6) . . ? 
C29 C30 C24 120.1(5) . . ? 
O11 C52 C51 127.1(5) . . ? 
O11 C52 C53 110.0(5) . . ? 
C51 C52 C53 122.8(5) . . ? 
C1 C2 O1 126.8(5) . . ? 
C1 C2 C3 123.9(5) . . ? 
O1 C2 C3 109.2(5) . . ? 
C56 C55 C60 122.2(6) . . ? 
C56 C55 H55 118.9 . . ? 
C60 C55 H55 118.9 . . ? 
C13 C14 C20 119.1(5) . . ? 
C13 C14 H14 120.4 . . ? 
C20 C14 H14 120.4 . . ? 
O2 C3 C88 128.3(5) . . ? 
O2 C3 C2 110.9(5) . . ? 
C88 C3 C2 120.8(5) . . ? 
C35 C36 C37 119.9(5) . . ? 
C35 C36 H36 120.0 . . ? 
C37 C36 H36 120.0 . . ? 
C14 C13 O4 128.8(5) . . ? 
C14 C13 C12 121.3(5) . . ? 
O4 C13 C12 109.9(5) . . ? 
O6 C23 C24 127.7(5) . . ? 
O6 C23 C22 111.5(5) . . ? 
C24 C23 C22 120.9(5) . . ? 
C11 C12 O3 126.6(5) . . ? 
C11 C12 C13 123.1(5) . . ? 
O3 C12 C13 110.3(4) . . ? 
C54 C53 O12 128.0(5) . . ? 
C54 C53 C52 122.1(5) . . ? 
O12 C53 C52 109.9(5) . . ? 
C59 C60 C54 120.5(5) . . ? 
C59 C60 C55 118.3(6) . . ? 
C54 C60 C55 121.1(5) . . ? 
C23 C24 C30 118.2(5) . . ? 
C23 C24 H24 120.9 . . ? 
C30 C24 H24 120.9 . . ? 
C27 C28 C29 122.0(5) . . ? 
C27 C28 H28 119.0 . . ? 
C29 C28 H28 119.0 . . ? 
C9 C10 C5 117.8(6) . . ? 
C9 C10 C88 121.3(5) . . ? 
C5 C10 C88 120.7(6) . . ? 
C46 C45 C50 120.5(5) . . ? 
C46 C45 H45 119.7 . . ? 
C50 C45 H45 119.8 . . ? 
C15 C20 C19 119.1(5) . . ? 
C15 C20 C14 121.5(5) . . ? 
C19 C20 C14 119.4(5) . . ? 
C17 C18 C19 121.1(6) . . ? 
C17 C18 H18 119.5 . . ? 
C19 C18 H18 119.4 . . ? 
C57 C58 C59 120.8(6) . . ? 
C57 C58 H58 119.6 . . ? 
C59 C58 H58 119.6 . . ? 
C48 C47 C46 120.2(5) . . ? 
C48 C47 H47 119.9 . . ? 
C46 C47 H47 119.9 . . ? 
C28 C27 C26 119.6(6) . . ? 
C28 C27 H27 120.2 . . ? 
C26 C27 H27 120.2 . . ? 
C47 C48 C49 121.1(5) . . ? 
C47 C48 H48 119.5 . . ? 
C49 C48 H48 119.5 . . ? 
C8 C9 C10 119.4(5) . . ? 
C8 C9 C1 121.6(5) . . ? 
C10 C9 C1 119.0(5) . . ? 
C18 C17 C16 119.8(6) . . ? 
C18 C17 H17 120.1 . . ? 
C16 C17 H17 120.1 . . ? 
C9 C8 C7 122.1(6) . . ? 
C9 C8 H8 118.9 . . ? 
C7 C8 H8 118.9 . . ? 
C25 C26 C27 119.3(6) . . ? 
C25 C26 H26 120.3 . . ? 
C27 C26 H26 120.3 . . ? 
C26 C25 C30 122.2(6) . . ? 
C26 C25 H25 118.9 . . ? 
C30 C25 H25 118.9 . . ? 
C45 C46 C47 120.8(5) . . ? 
C45 C46 H46 119.6 . . ? 
C47 C46 H46 119.6 . . ? 
C3 C88 C10 118.2(5) . . ? 
C3 C88 H88 120.9 . . ? 
C10 C88 H88 120.9 . . ? 
C55 C56 C57 119.9(6) . . ? 
C55 C56 H56 120.1 . . ? 
C57 C56 H56 120.1 . . ? 
C8 C7 C6 119.0(7) . . ? 
C8 C7 H7 120.5 . . ? 
C6 C7 H7 120.5 . . ? 
C58 C57 C56 120.5(6) . . ? 
C58 C57 H57 119.8 . . ? 
C56 C57 H57 119.7 . . ? 
C15 C16 C17 120.1(6) . . ? 
C15 C16 H16 119.9 . . ? 
C17 C16 H16 120.0 . . ? 
C16 C15 C20 121.4(6) . . ? 
C16 C15 H15 119.3 . . ? 
C20 C15 H15 119.3 . . ? 
C6 C5 C10 121.7(7) . . ? 
C6 C5 H5 119.2 . . ? 
C10 C5 H5 119.1 . . ? 
C5 C6 C7 119.9(6) . . ? 
C5 C6 H6 120.1 . . ? 
C7 C6 H6 120.0 . . ? 
N4 C70 H70A 109.6 . . ? 
N4 C70 H70B 109.5 . . ? 
H70A C70 H70B 109.4 . . ? 
N4 C70 H70C 109.4 . . ? 
H70A C70 H70C 109.4 . . ? 
H70B C70 H70C 109.4 . . ? 
N4 C69 H69A 109.6 . . ? 
N4 C69 H69B 109.9 . . ? 
H69A C69 H69B 109.1 . . ? 
N4 C69 H69C 110.1 . . ? 
H69A C69 H69C 109.1 . . ? 
H69B C69 H69C 109.1 . . ? 
N1 C62 H62A 109.4 . . ? 
N1 C62 H62B 109.5 . . ? 
H62A C62 H62B 109.5 . . ? 
N1 C62 H62C 109.5 . . ? 
H62A C62 H62C 109.5 . . ? 
H62B C62 H62C 109.5 . . ? 
N1 C61 H61A 109.5 . . ? 
N1 C61 H61B 109.5 . . ? 
H61A C61 H61B 109.5 . . ? 
N1 C61 H61C 109.5 . . ? 
H61A C61 H61C 109.5 . . ? 
H61B C61 H61C 109.5 . . ? 
O15 C71 N5 125.0(15) . . ? 
O15 C71 H71 117.5 . . ? 
N5 C71 H71 117.5 . . ? 
O16 C74 N6 122.2(14) . . ? 
O16 C74 H74 118.8 . . ? 
N6 C74 H74 119.0 . . ? 
N6 C75 H75A 109.3 . . ? 
N6 C75 H75B 109.6 . . ? 
H75A C75 H75B 109.5 . . ? 
N6 C75 H75C 109.5 . . ? 
H75A C75 H75C 109.5 . . ? 
H75B C75 H75C 109.5 . . ? 
N6 C76 H76A 109.4 . . ? 
N6 C76 H76B 109.6 . . ? 
H76A C76 H76B 109.5 . . ? 
N6 C76 H76C 109.4 . . ? 
H76A C76 H76C 109.5 . . ? 
H76B C76 H76C 109.5 . . ? 
C32 O7 B3 106.9(4) . . ? 
C32 O7 K1 120.5(3) . . ? 
B3 O7 K1 97.9(3) . . ? 
C22 O5 B2 107.5(4) . . ? 
C22 O5 K1 122.6(3) . . ? 
B2 O5 K1 97.5(3) . . ? 
C12 O3 B2 106.8(4) . . ? 
C12 O3 K1 120.9(3) . . ? 
B2 O3 K1 100.2(3) . . ? 
C42 O9 B3 106.9(4) . . ? 
C42 O9 K1 121.5(3) . . ? 
B3 O9 K1 98.1(3) . . ? 
C43 O10 B3 107.3(4) . . ? 
C33 O8 B3 107.0(4) . . ? 
C23 O6 B2 107.4(4) . . ? 
C13 O4 B2 107.7(4) . . ? 
C2 O1 B1 107.6(4) . . ? 
C2 O1 K1 115.1(3) . . ? 
B1 O1 K1 97.9(3) . . ? 
C3 O2 B1 107.4(4) . . ? 
C53 O12 B1 107.4(4) . . ? 
O12 B1 O2 114.7(5) . . ? 
O12 B1 O1 111.7(5) . . ? 
O2 B1 O1 104.6(5) . . ? 
O12 B1 O11 104.7(5) . . ? 
O2 B1 O11 109.5(5) . . ? 
O1 B1 O11 111.7(5) . . ? 
O12 B1 K1 122.4(4) . . ? 
O2 B1 K1 122.8(4) . . ? 
O1 B1 K1 57.5(3) . . ? 
O11 B1 K1 54.2(3) . . ? 
O6 B2 O4 113.1(5) . . ? 
O6 B2 O5 104.7(4) . . ? 
O4 B2 O5 111.6(5) . . ? 
O6 B2 O3 111.5(5) . . ? 
O4 B2 O3 104.7(4) . . ? 
O5 B2 O3 111.4(4) . . ? 
O6 B2 K1 125.1(4) . . ? 
O4 B2 K1 121.8(4) . . ? 
O5 B2 K1 57.0(2) . . ? 
O3 B2 K1 54.4(2) . . ? 
O7 B3 O8 105.6(4) . . ? 
O7 B3 O10 111.9(5) . . ? 
O8 B3 O10 112.4(5) . . ? 
O7 B3 O9 112.7(4) . . ? 
O8 B3 O9 109.8(5) . . ? 
O10 B3 O9 104.6(4) . . ? 
O7 B3 K1 56.7(2) . . ? 
O8 B3 K1 125.9(3) . . ? 
O10 B3 K1 121.7(4) . . ? 
O9 B3 K1 56.1(2) . . ? 
C62 N1 C61 110.4(7) . . ? 
C62 N1 H1A 109.6 . . ? 
C61 N1 H1A 109.6 . . ? 
C62 N1 H1B 109.6 . . ? 
C61 N1 H1B 109.6 . . ? 
H1A N1 H1B 108.1 . . ? 
C74 N6 C76 117.6(13) . . ? 
C74 N6 C75 124.2(15) . . ? 
C76 N6 C75 118.0(16) . . ? 
C68 O14 K1 113(3) . . ? 
N2 C63 H63A 110.2 . . ? 
N2 C63 H63B 110.0 . . ? 
H63A C63 H63B 109.5 . . ? 
N2 C63 H63C 108.2 . . ? 
H63A C63 H63C 109.5 . . ? 
H63B C63 H63C 109.5 . . ? 
N5 C72 H72A 109.8 . . ? 
N5 C72 H72B 109.6 . . ? 
H72A C72 H72B 109.2 . . ? 
N5 C72 H72C 109.6 . . ? 
H72A C72 H72C 109.3 . . ? 
H72B C72 H72C 109.3 . . ? 
C63 N2 C64 105(3) . . ? 
C63 N2 H2A 110.4 . . ? 
C64 N2 H2A 114.3 . . ? 
C63 N2 H2B 110.1 . . ? 
C64 N2 H2B 108.4 . . ? 
H2A N2 H2B 108.9 . . ? 
C65 O13 K1 124.5(11) . . ? 
N3 C66 H66A 111.3 . . ? 
N3 C66 H66B 111.2 . . ? 
H66A C66 H66B 107.7 . . ? 
N3 C66 H66C 111.2 . . ? 
H66A C66 H66C 107.7 . . ? 
H66B C66 H66C 107.6 . . ? 
N5 C73 H73A 109.5 . . ? 
N5 C73 H73B 109.3 . . ? 
H73A C73 H73B 109.5 . . ? 
N5 C73 H73C 109.6 . . ? 
H73A C73 H73C 109.5 . . ? 
H73B C73 H73C 109.5 . . ? 
C71 N5 C73 121.1(12) . . ? 
C71 N5 C72 118.1(13) . . ? 
C73 N5 C72 120.7(12) . . ? 
N2 C64 H64A 106.4 . . ? 
N2 C64 H64B 113.1 . . ? 
H64A C64 H64B 127.2 . . ? 
N2 C64 H64C 109.5 . . ? 
H64A C64 H64C 99.9 . . ? 
H64B C64 H64C 98.4 . . ? 
C65 N3 C66 120.8(17) . . ? 
C65 N3 C67 121.4(16) . . ? 
C66 N3 C67 117.8(18) . . ? 
N3 C67 H67A 109.5 . . ? 
N3 C67 H67B 109.7 . . ? 
H67A C67 H67B 109.4 . . ? 
N3 C67 H67C 109.4 . . ? 
H67A C67 H67C 109.4 . . ? 
H67B C67 H67C 109.4 . . ? 
O13 C65 N3 133.5(19) . . ? 
O13 C65 H65 113.2 . . ? 
N3 C65 H65 113.3 . . ? 
O14 C68 N4 109(3) . . ? 
O14 C68 H68 125.4 . . ? 
N4 C68 H68 125.1 . . ? 
C70 N4 C69 116(3) . . ? 
C70 N4 C68 138(3) . . ? 
C69 N4 C68 105(2) . . ? 
 
_diffrn_measured_fraction_theta_max    0.861 
_diffrn_reflns_theta_full              27.09 
_diffrn_measured_fraction_theta_full   0.861 
_refine_diff_density_max    3.008 
_refine_diff_density_min   -1.145 
_refine_diff_density_rms    0.176 
